# Supplementary material
Source: PubMed Central journal article supplement (PMC8194049)
Supplement: NIHMS1710612-supplement-1.pdf [file NIHMS1710612-supplement-1.pdf]

## Supporting Information

### **Nano-in-Nano Dendrimer Gel Particles for Efficient Topical Delivery of Antiglaucoma Drugs into the Eye**

*Juan Wang<sup>a</sup>, Boxuan Li<sup>b</sup>, Da Huang<sup>c</sup>, Pedro Norat<sup>d</sup>, Marta Grannonico<sup>d</sup>, Remy C. Cooper<sup>e</sup>, Qin Gui<sup>f</sup>, Woon Nam Chow<sup>g,h</sup>, Xiaorong Liu<sup>d,i,\*</sup>, and Hu Yang<sup>c,\*</sup>*

<sup>a</sup>College of Biomedical Engineering, Sichuan University, Chengdu, Sichuan 610065, China

<sup>b</sup>Tianjin Key Laboratory of Biomedical Materials, Key Laboratory of Biomaterials and Nanotechnology for Cancer Immunotherapy, Institute of Biomedical Engineering, Chinese Academy of Medical Sciences & Peking Union Medical College, Tianjin, 300192, China

<sup>c</sup>Linda and Bipin Doshi Department of Chemical and Biochemical Engineering, Missouri University of Science and Technology, Rolla, Missouri 65409, United States

<sup>d</sup>Department of Biology, University of Virginia, Charlottesville, Virginia 22904, United States

<sup>e</sup>Department of Biomedical Engineering, Virginia Commonwealth University, Richmond, Virginia 23298, United States

<sup>f</sup>Department of Chemical and Life Science Engineering, Virginia Commonwealth University, Richmond, Virginia 23219, United States

<sup>g</sup>Department of Pathology, Virginia Commonwealth University, Richmond, Virginia 23298, United States

<sup>h</sup>Department of Ophthalmology, Virginia Commonwealth University, Richmond, Virginia 23298, United States

<sup>i</sup>Department of Psychology, University of Virginia, Charlottesville, Virginia 22904, United States.

\*Corresponding authors: xl8n@virginia.edu (XL), huyang@mst.edu (HY)

**Table S1.** Conditions for making dendrimer gel particles of various sizes.

|                                      | <b><math>\mu</math>DHP10</b> | <b><math>\mu</math>DHP3</b> | <b>nDHP</b>      |
|--------------------------------------|------------------------------|-----------------------------|------------------|
| Surfactant<br>tween80/span80 (w/w)   | 1/5                          | 1/5                         | 4.5/5            |
| Oil phase<br>surfactant/hexane (v/v) | 1/70                         | 1/70                        | 3.7/70           |
| Water phase                          | DH-G5-10%                    | DH-G5-10%                   | DH-G5-10%        |
| O/W (v/v)                            | 10/1                         | 35/1                        | 762/1            |
| Emulsion formulation                 | Disperser, 30 000 rpm        | Disperser, 30 000 rpm       | Stirrer, 700 rpm |
| Processing                           | 2 h at 500 rpm               | 2 h at 500 rpm              | 2 h at 500 rpm   |

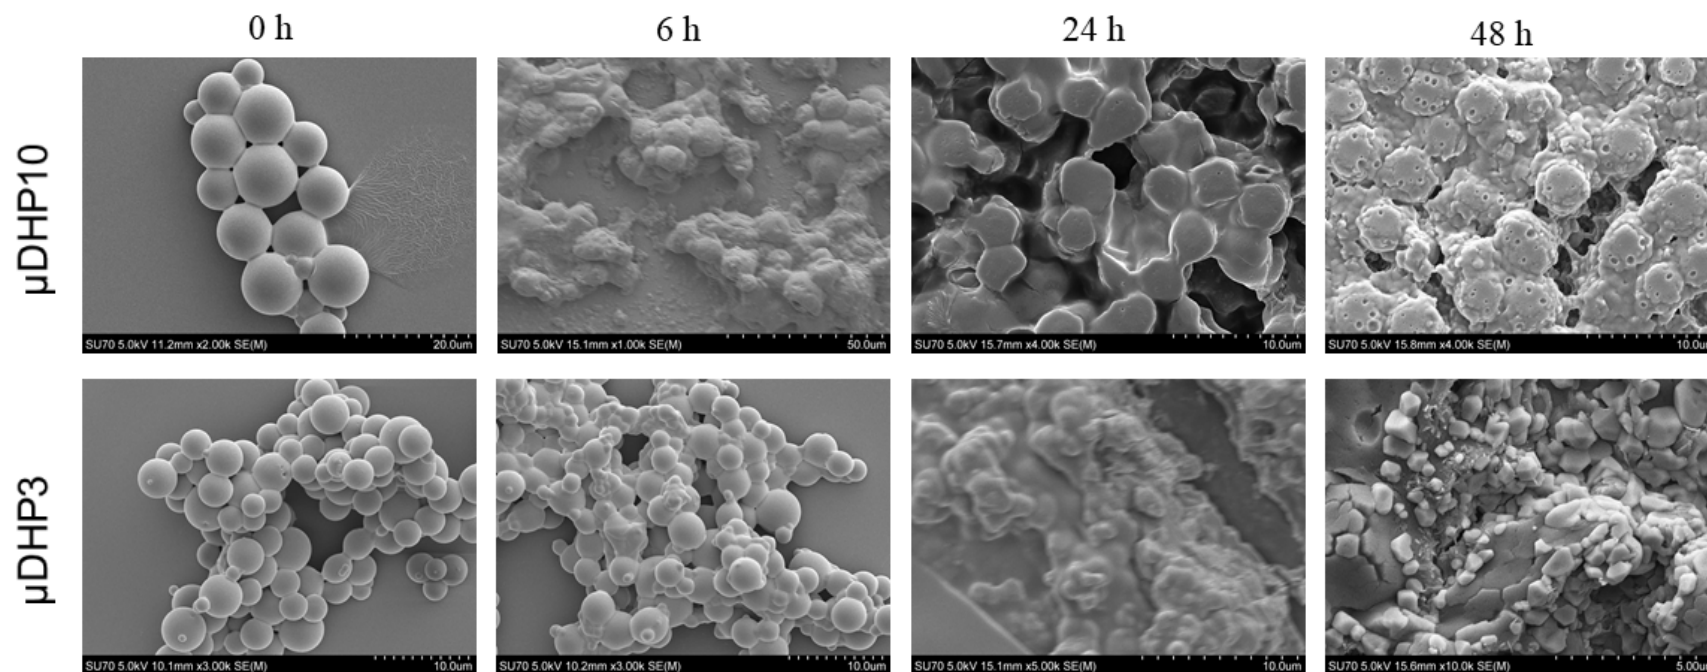

**Figure S1.** SEM images of  $\mu$ DHPs after incubation for different lengths of time in contrived tears incubated at 37 °C.

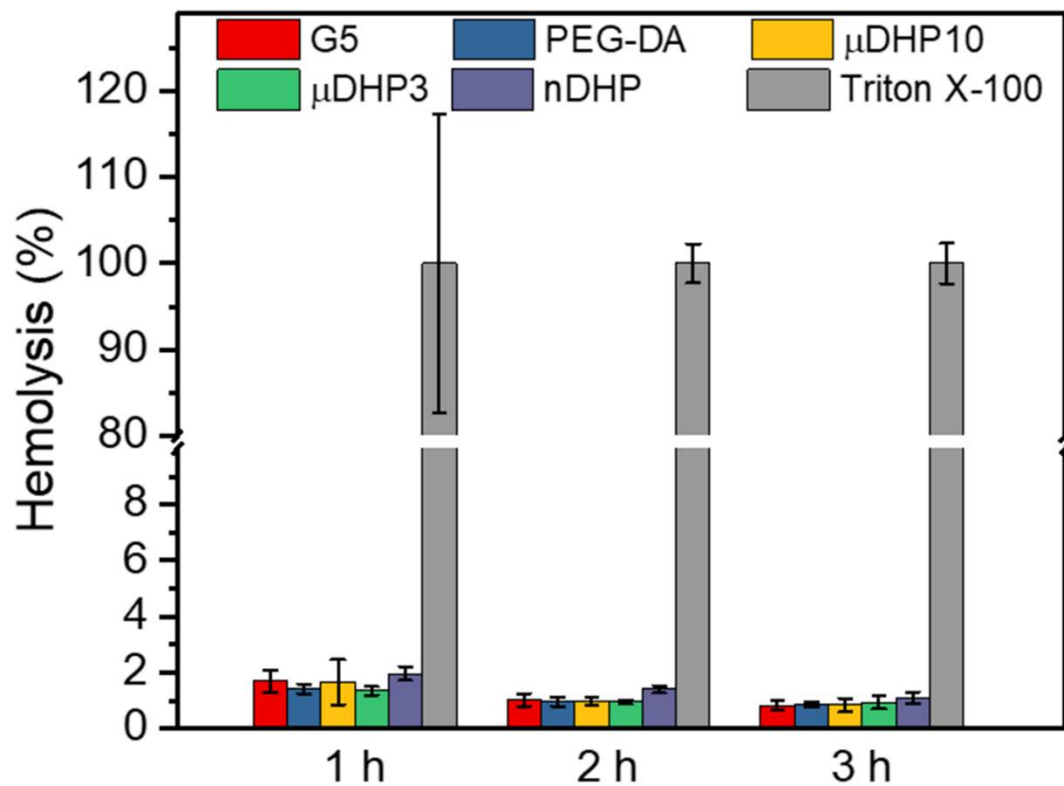

**Figure S2.** Hemolytic effect of  $\mu$ DHP10,  $\mu$ DHP3, nDHP, G5 and PEG-DA on rabbit red blood cells at 37 °C in water. Triton X-100 served as positive control and PBS (pH 7.4, 1 $\times$ ) as negative control.

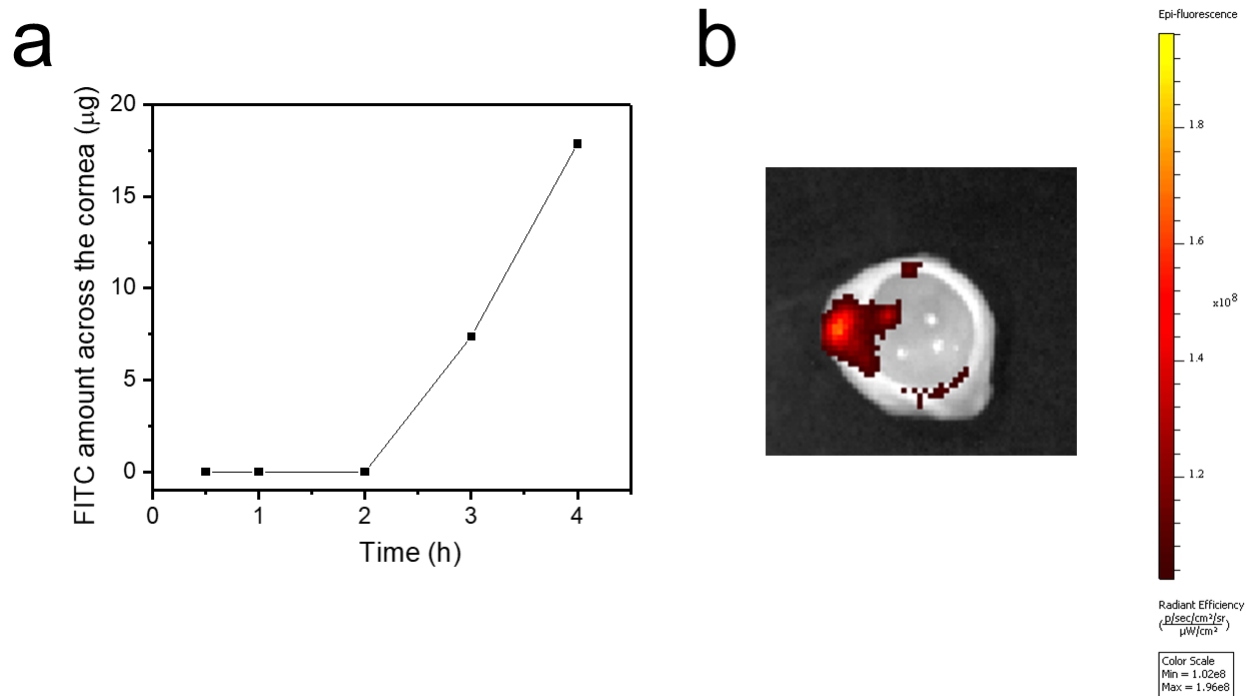

**Figure S3.** *Ex vivo* permeation of  $\mu\text{DHP3}$ . a) Corneas were extracted from fresh rabbit eyes and mounted in a Franz diffusion cell system. The receiver chamber was filled with PBS. FITC-labeled microgel ( $\mu\text{DHP3}^{\text{FITC}}$ , 200  $\mu\text{L}$ ) was loaded to the donor chamber. At pre-determined time points up to 4 h, an aliquot of 500  $\mu\text{L}$  from the receiver chamber was withdrawn and analyzed with UV-Vis. Fresh PBS (500  $\mu\text{L}$ ) was added to the receiver chamber following each sampling. The concentration of FITC for each sampling and those remained in donor chamber were detected by UV-Vis based on a standard curve of FITC. b) The NiR dye labeled  $\mu\text{DHP3}$  was topical administered on the rabbit eye globe *ex vivo*. After stored at RT for 48 h, the globe surface was washed gently by PBS, and then imaged on IVIS-200. The DiR signals showed on the cornea after 48 h, indicating the retention of the particles on the cornea.

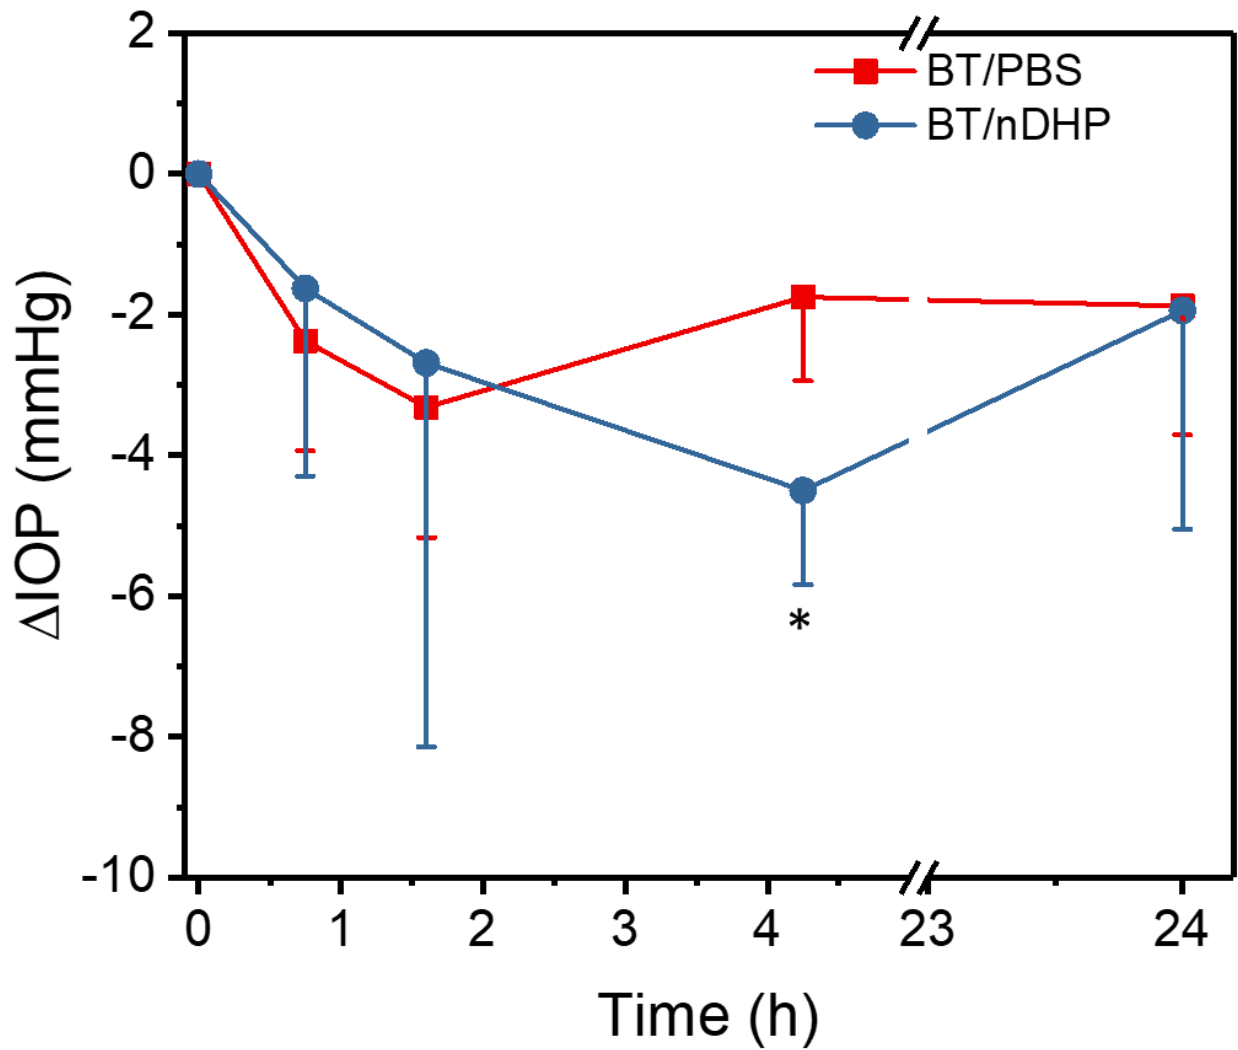

**Figure S4.** In vivo IOP-lowering effect of BT/nDHP and BT/PBS in normotensive rats after one-time topical administration. \*  $P < 0.05$ .

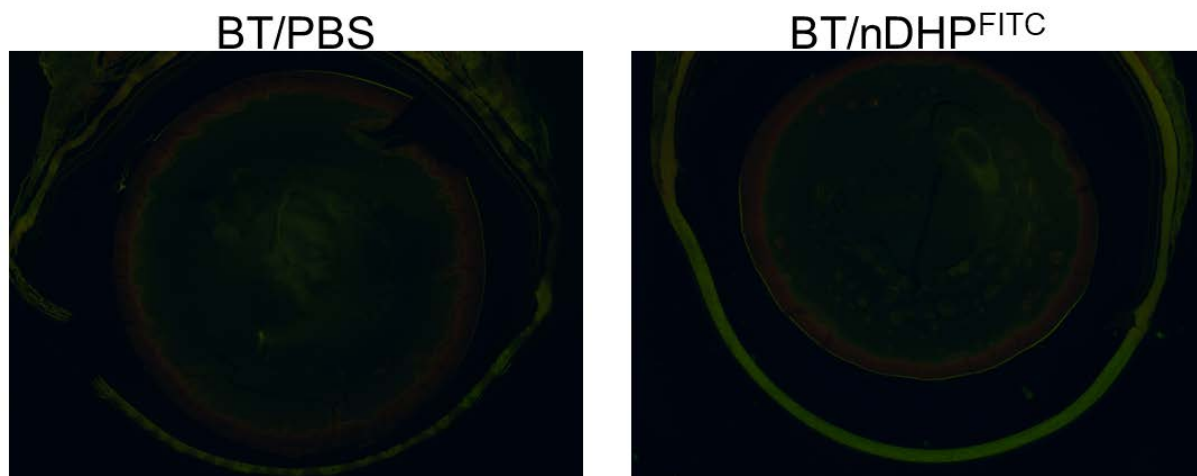

**Figure S5.** Fluorescent imaging of whole-mount globes. Following once-daily instillation of BT/PBS and BT/nDHP<sup>FITC</sup> for 7 days, there is retention of FITC-labeled nDHP in the fibrous tunic, including the cornea.
